# Supplementary material for: Alkali metal carbonate catalyzed copolymerization of anhydrides and epoxides: a simple, efficient and versatile approach to well-defined alternating polyesters
Source: Royal Society of Chemistry journal article supplement (doi:10.1039/d2py01507b), 2023-01-01
Supplement: d2py01507b1.pdf [file d2py01507b1.pdf]

## **Alkali Metal Carbonates Catalyzed Copolymerization of Anhydrides and Epoxides: Simple, Efficient and Versatile Approach to Well-Defined Alternating Polyesters**

Hongyan Xie,<sup>a, c</sup> Lanlan Zheng,<sup>b</sup> Jiabing Feng,<sup>a</sup> Xinyu Wang,<sup>b</sup> Suping Kuang,<sup>b</sup> Li Zhou,<sup>b</sup> Jia Jiang,<sup>b</sup> Yaling Xu,<sup>b</sup> Yan Zhao,<sup>d</sup> and Zhiguang Xu<sup>a,\*</sup>

*<sup>a</sup>China-Australia Institute for Advanced Materials and Manufacturing, Jiaxing University, Jiaxing 314000, China*

*<sup>b</sup>School of Biological and Chemical Engineering, Jiaxing University, Jiaxing 314000, China.*

*<sup>c</sup>China National Textile and Apparel Council Key Laboratory of Flame Retardancy Finishing of Textile Materials, Soochow University, Suzhou 215123, China*

*<sup>d</sup>College of Textile and Clothing Engineering, Soochow University, Suzhou 215123, China.*

Corresponding author: [zhiguang.xu@zjxu.edu.cn](mailto:zhiguang.xu@zjxu.edu.cn) (Z. Xu)

Table S1. Kinetic study for ROAP of PA and CHO induced by  $\text{Cs}_2\text{CO}_3$ .<sup>a</sup>

| Run | Time (min) | Conv. <sup>b</sup> (%) | $M_{n,\text{GPC}}$ <sup>c</sup> (kg/mol) | $M_w/M_n$ <sup>c</sup> |
|-----|------------|------------------------|------------------------------------------|------------------------|
| 1   | 20         | 21.0                   | 1.2                                      | 1.30                   |
| 2   | 40         | 38.8                   | 2.4                                      | 1.27                   |
| 3   | 60         | 50.6                   | 2.6                                      | 1.24                   |
| 4   | 80         | 65.8                   | 3.4                                      | 1.25                   |
| 5   | 100        | 76.4                   | 4.1                                      | 1.27                   |
| 6   | 240        | 100                    | 5.3                                      | 1.15                   |

<sup>a</sup>The polymerizations were conducted in bulk at 100 °C, BnOH was used as the initiator (10.4  $\mu\text{L}$ , 0.1 mmol),  $[\text{Cs}_2\text{CO}_3]:[\text{BnOH}]:[\text{PA}]:[\text{CHO}] = 0.2:1:100:500$ . <sup>b</sup>Determined by  $^1\text{H}$  NMR. <sup>c</sup>Determined by gel permeation chromatography (GPC) in THF against polystyrene standard.

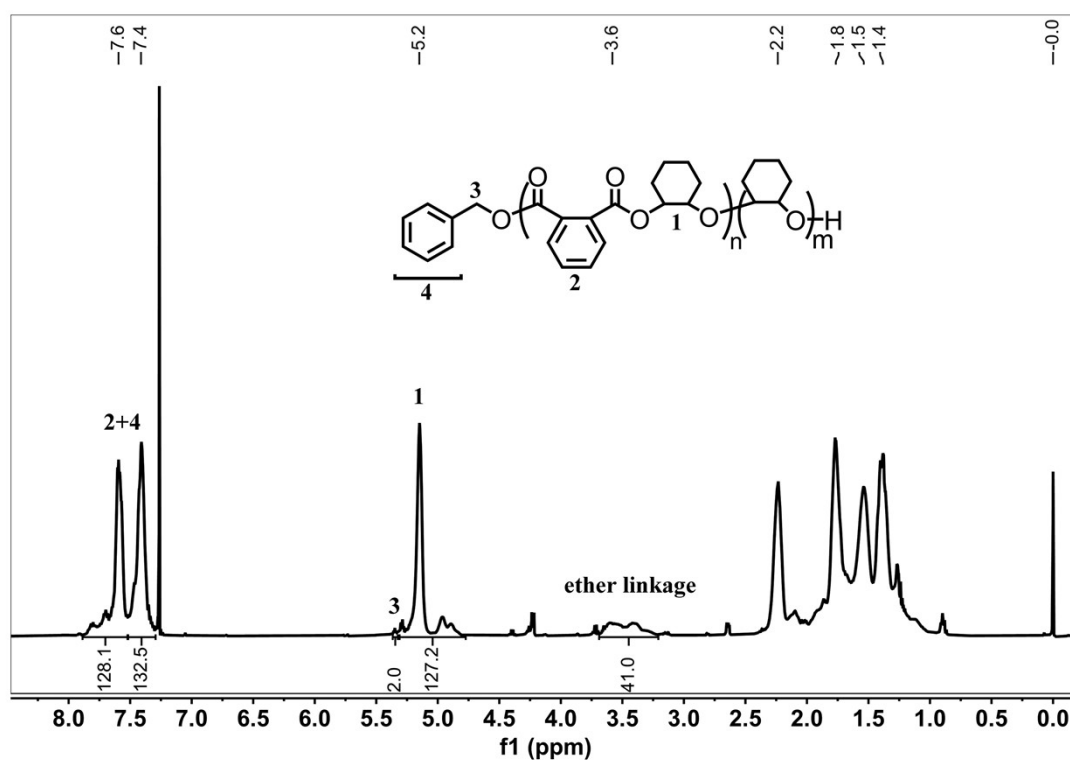

Fig. S1.  $^1\text{H}$  NMR of poly(PA-*alt*-CHO) catalyzed by  $\text{Na}_2\text{CO}_3$  at 100 °C,  $[\text{C}]:[\text{I}]:[\text{PA}]:[\text{CHO}] = 0.2:1:100:500$  (Table 1, Run 2; 25 °C,  $\text{CDCl}_3$ ).

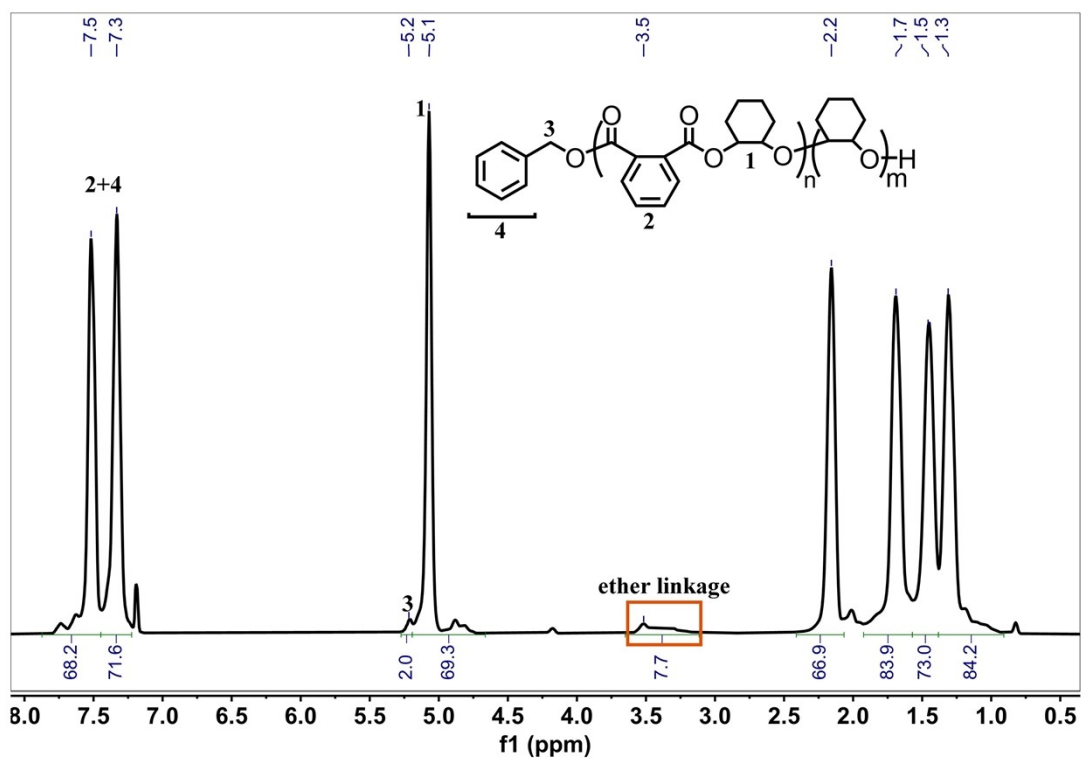

Fig. S2.  $^1\text{H}$  NMR of poly(PA-*alt*-CHO) catalyzed by  $\text{K}_2\text{CO}_3$  at  $100\text{ }^\circ\text{C}$ ,  $[\text{C}]:[\text{I}]:[\text{PA}]:[\text{CHO}] = 0.3:1:50:250$  (Table 1, Run 3;  $25\text{ }^\circ\text{C}$ ,  $\text{CDCl}_3$ ).

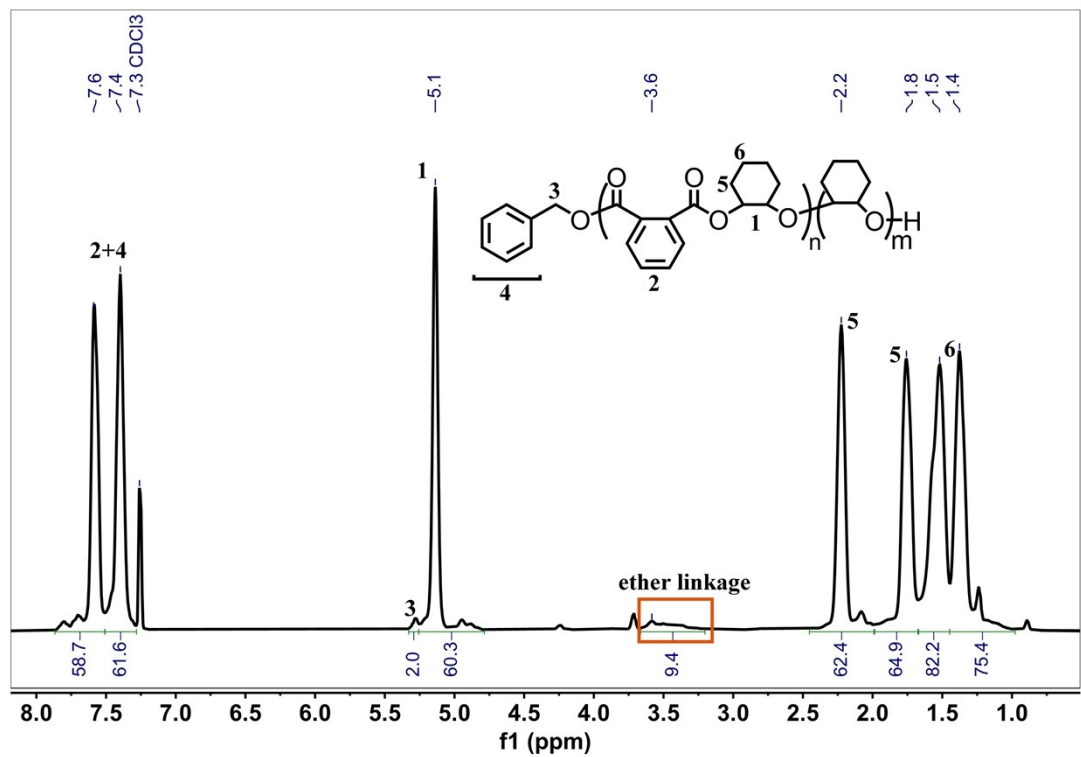

Fig. S3.  $^1\text{H}$  NMR of poly(PA-*alt*-CHO) catalyzed by  $\text{K}_2\text{CO}_3$  at  $60\text{ }^\circ\text{C}$ ,  $[\text{C}]:[\text{I}]:[\text{PA}]:[\text{CHO}] = 0.3:1:50:250$  (Table 1, Run 4;  $25\text{ }^\circ\text{C}$ ,  $\text{CDCl}_3$ ).

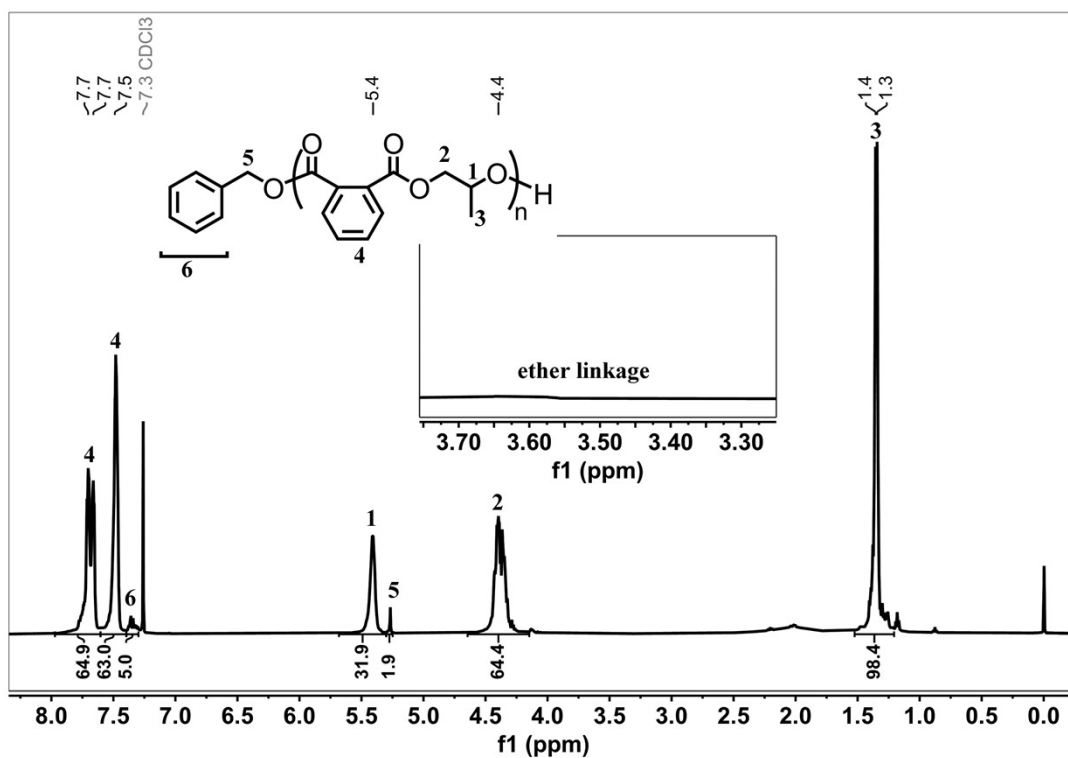

Fig. S4. <sup>1</sup>H NMR of poly(PA-*alt*-PO) catalyzed by K<sub>2</sub>CO<sub>3</sub> at 60 °C, [C]:[I]:[PA]:[PO] = 0.3:1:50:250 (Table 1, Run 7; 25 °C, CDCl<sub>3</sub>).

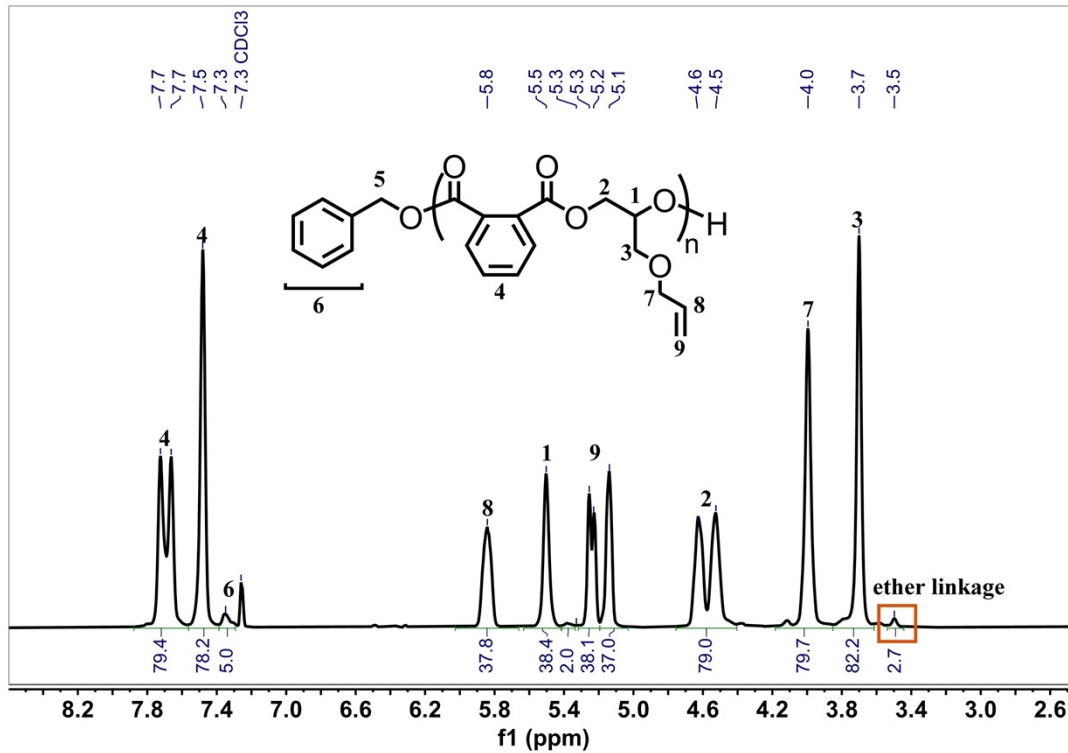

Fig. S5. <sup>1</sup>H NMR of poly(PA-*alt*-AGE) catalyzed by K<sub>2</sub>CO<sub>3</sub> at 100 °C, [C]:[I]:[PA]:[AGE] = 0.3:1:50:250 (Table 1, Run 8; 25 °C, CDCl<sub>3</sub>).

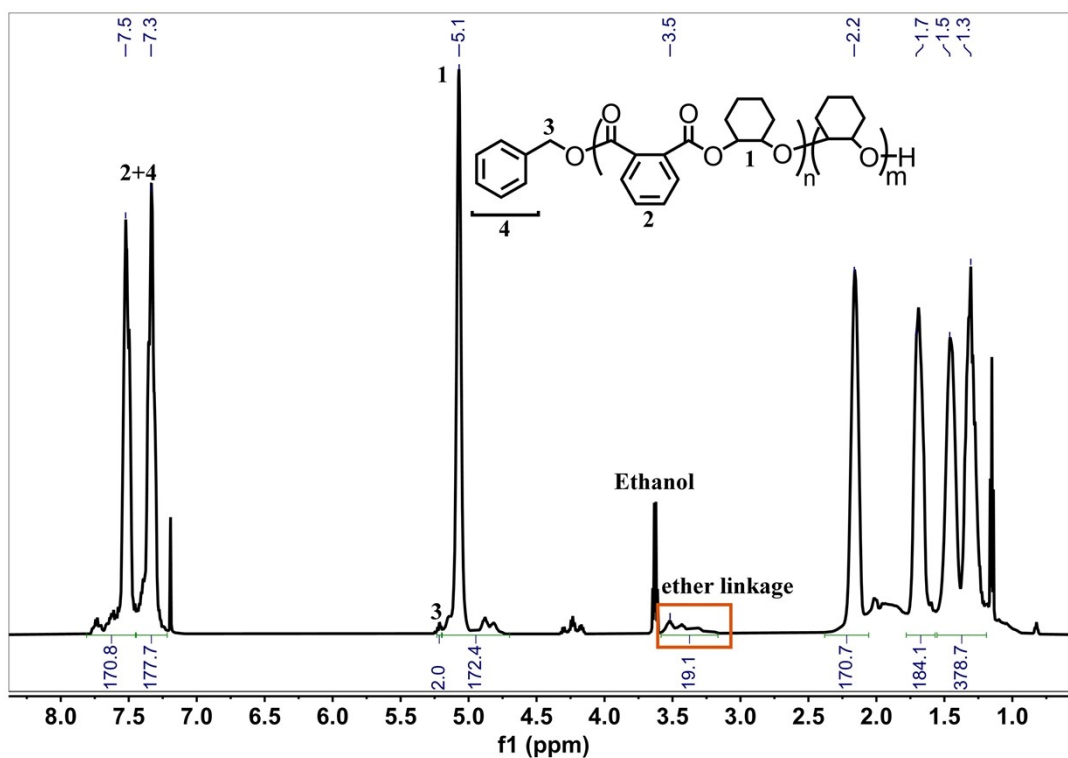

Fig. S6. <sup>1</sup>H NMR of poly(PA-*alt*-CHO) catalyzed by Cs<sub>2</sub>CO<sub>3</sub> at 100 °C, [C]:[I]:[PA]:[CHO] = 0.2:1:100:500 (Table 1, Run 5; 25 °C, CDCl<sub>3</sub>).

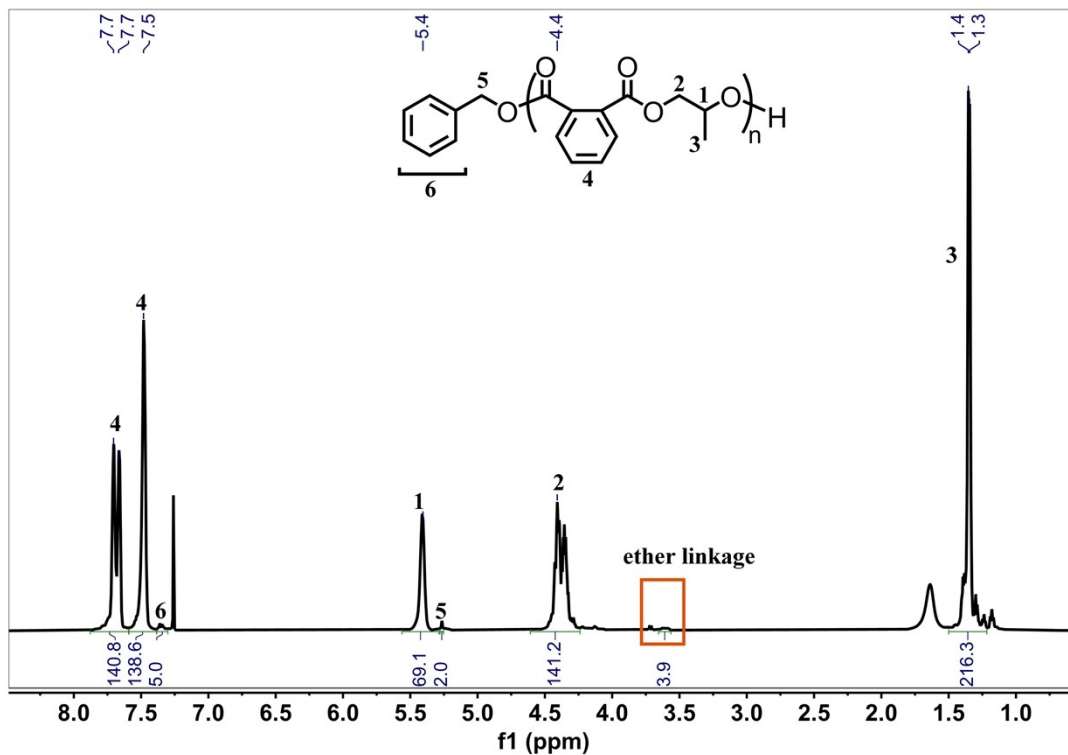

Fig. S7. <sup>1</sup>H NMR of poly(PA-*alt*-PO) catalyzed by Cs<sub>2</sub>CO<sub>3</sub> at 100 °C, [C]:[I]:[PA]:[PO] = 0.2:1:100:500 (Table 1, Run 9; 25 °C, CDCl<sub>3</sub>).

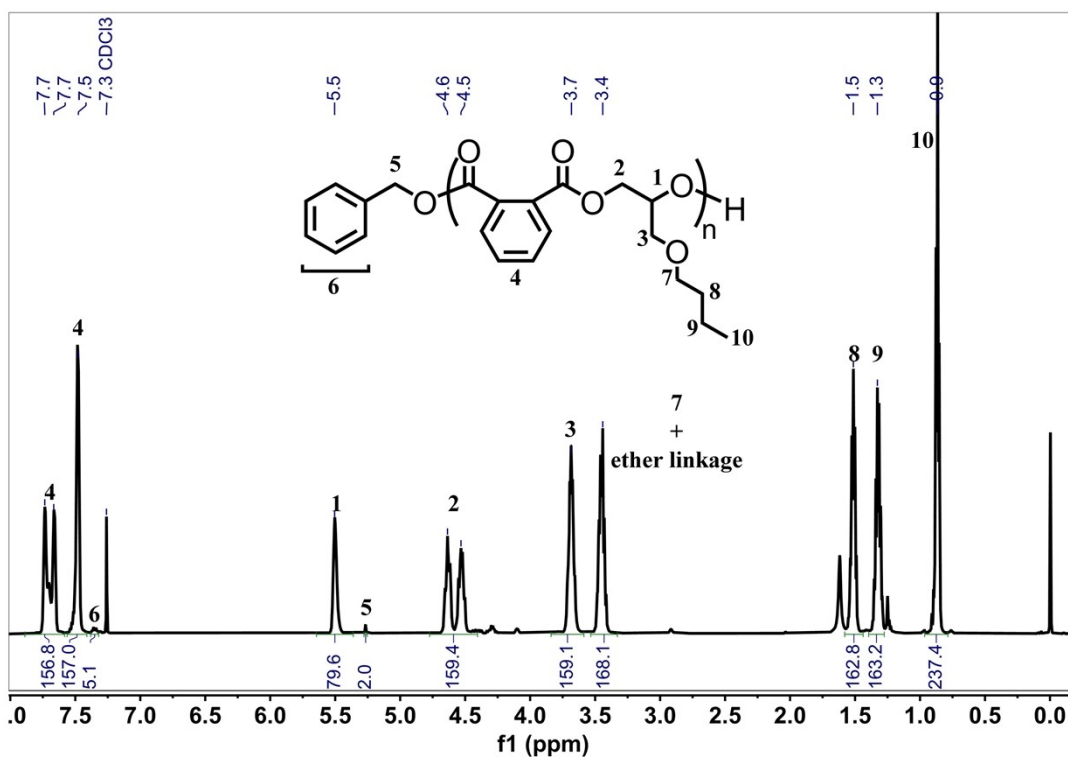

Fig. S8. <sup>1</sup>H NMR of poly(PA-*alt*-BGE) catalyzed by Cs<sub>2</sub>CO<sub>3</sub> at 100 °C, [C]:[I]:[PA]:[BGE] = 0.2:1:100:500 (Table 1, Run 10; 25 °C, CDCl<sub>3</sub>).

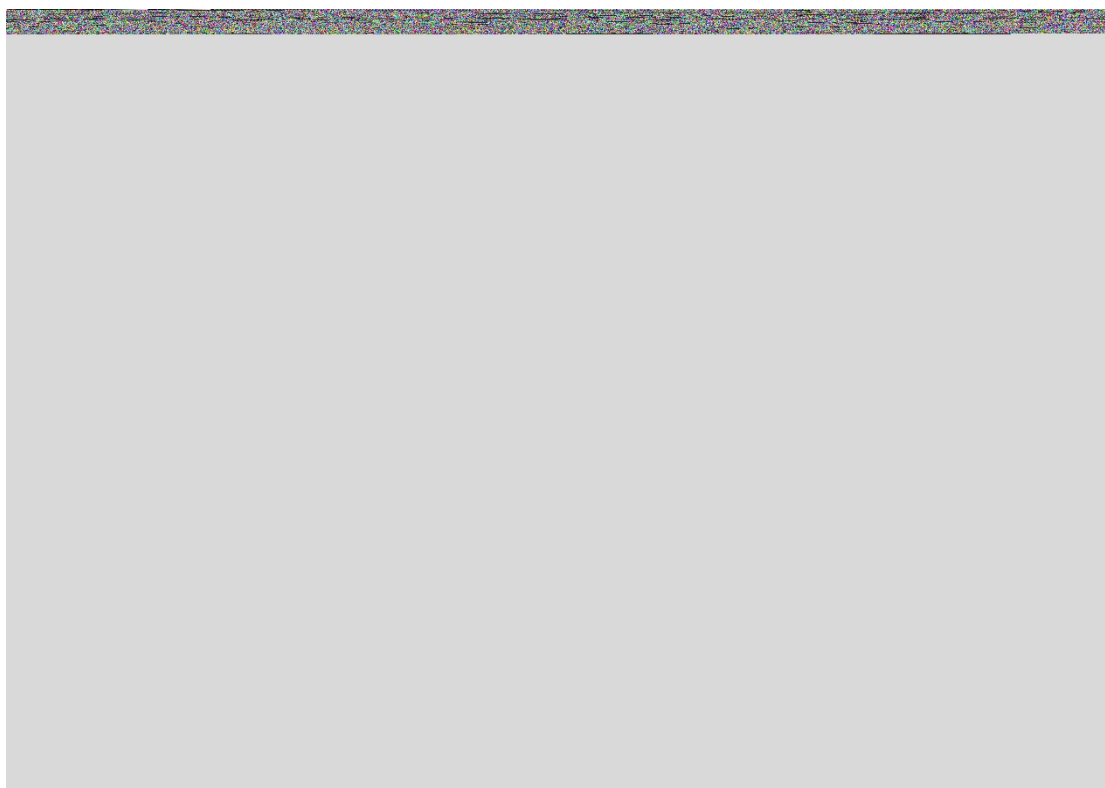

Fig. S9. <sup>1</sup>H NMR of poly(PA-*alt*-AGE) catalyzed by Cs<sub>2</sub>CO<sub>3</sub> at 100 °C, [C]:[I]:[PA]:[AGE] = 0.2:1:100:500 (Table 1, Run 11; 25 °C, CDCl<sub>3</sub>).

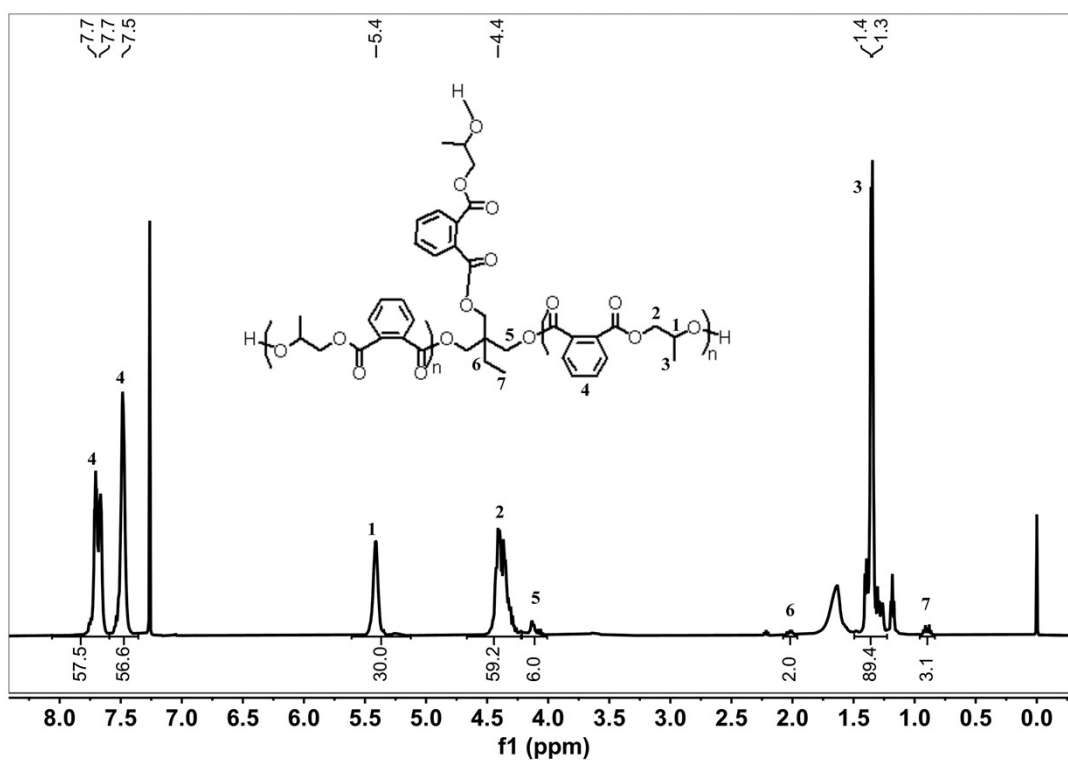

Fig. S10. <sup>1</sup>H NMR of poly(PA-*alt*-PO) catalyzed by Cs<sub>2</sub>CO<sub>3</sub> at 100 °C, [C]:[I]:[PA]:[PO] = 0.2:1:100:500 (Table 2, Run 2; 25 °C, CDCl<sub>3</sub>).

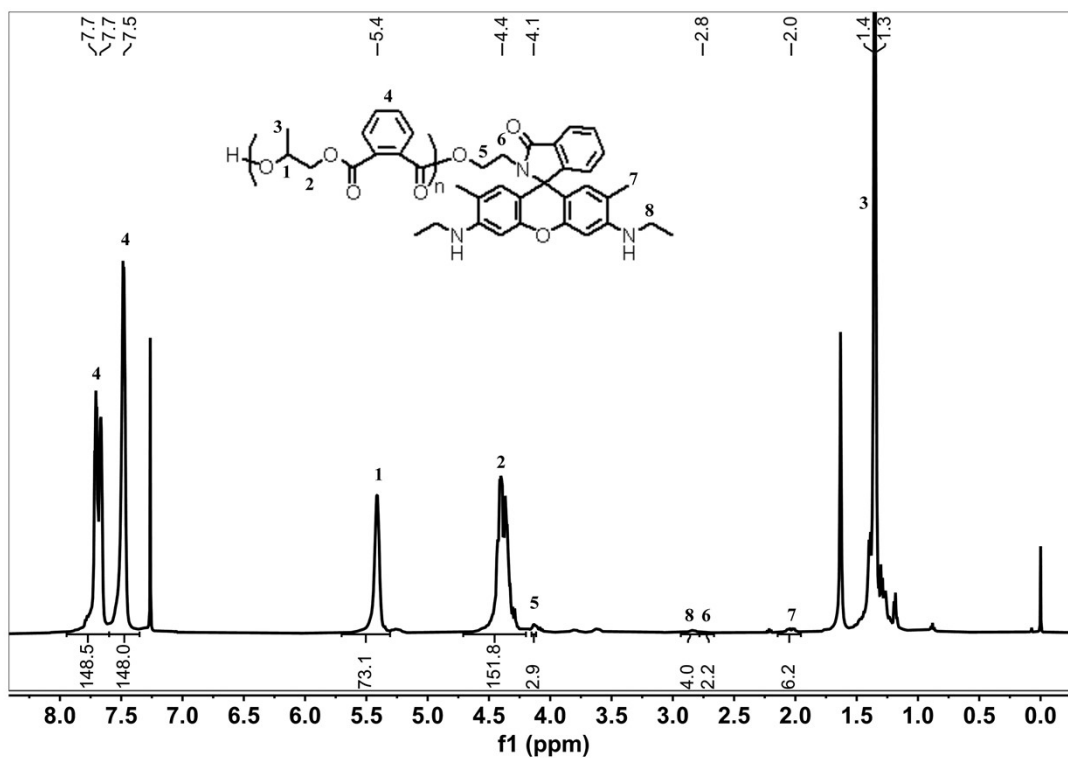

Fig. S11. <sup>1</sup>H NMR of poly(PA-*alt*-PO) catalyzed by Cs<sub>2</sub>CO<sub>3</sub> at 100 °C, [C]:[I]:[PA]:[PO] = 0.2:1:100:500 (Table 2, Run 3; 25 °C, CDCl<sub>3</sub>).

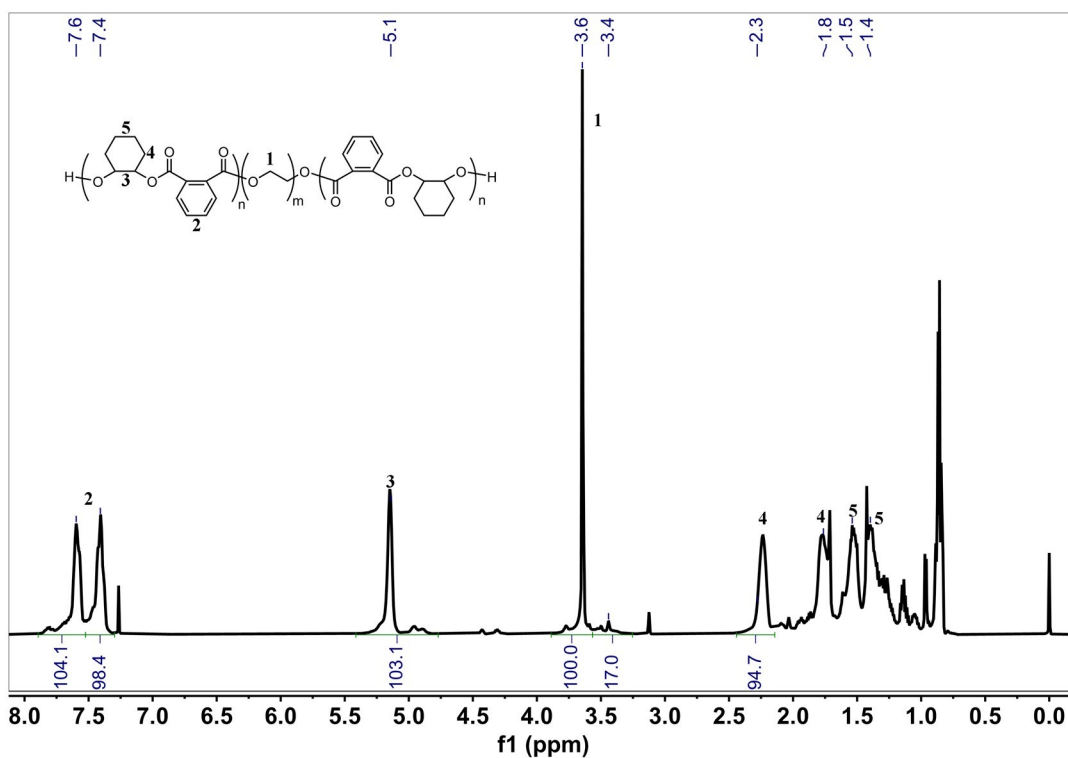

Fig. S12. <sup>1</sup>H NMR of poly(PA-*alt*-CHO)-*b*-PEG-*b*-poly(PA-*alt*-CHO) catalyzed by Cs<sub>2</sub>CO<sub>3</sub> at 100 °C, [C]:[I]:[PA]:[CHO] = 0.2:1:100:500 (Table 2, Run 4; 25 °C, CDCl<sub>3</sub>).

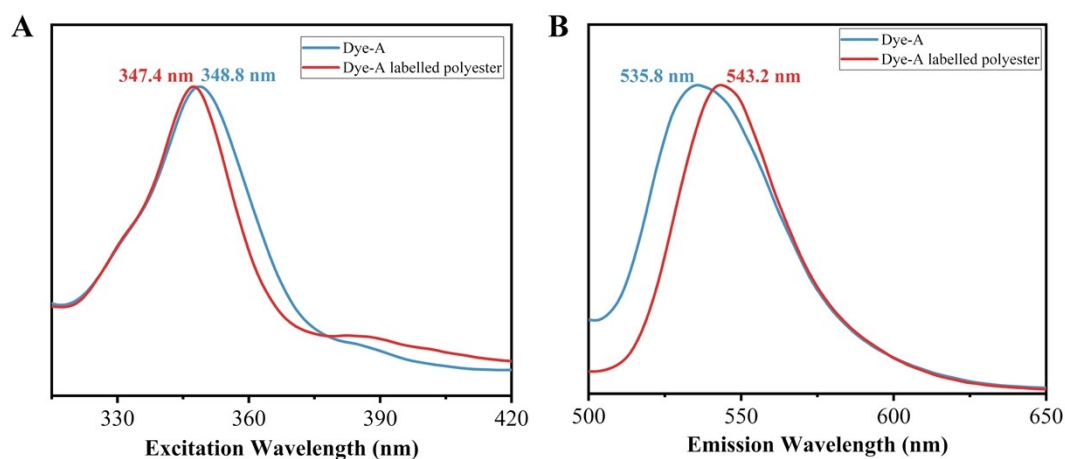

Fig. S13. The excitation spectrum (A) and emission spectrum (B) for Dye-A and Dye-A labelled poly(PA-*alt*-PO).



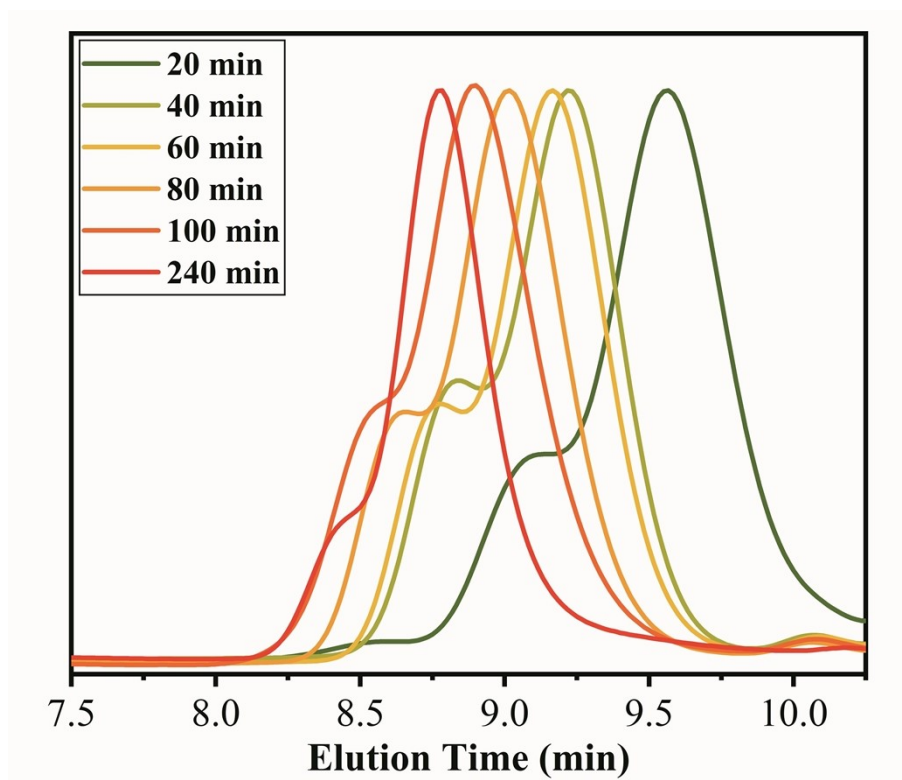

Fig. S14. Evolution of GPC curves for the kinetic studies (Table S1).

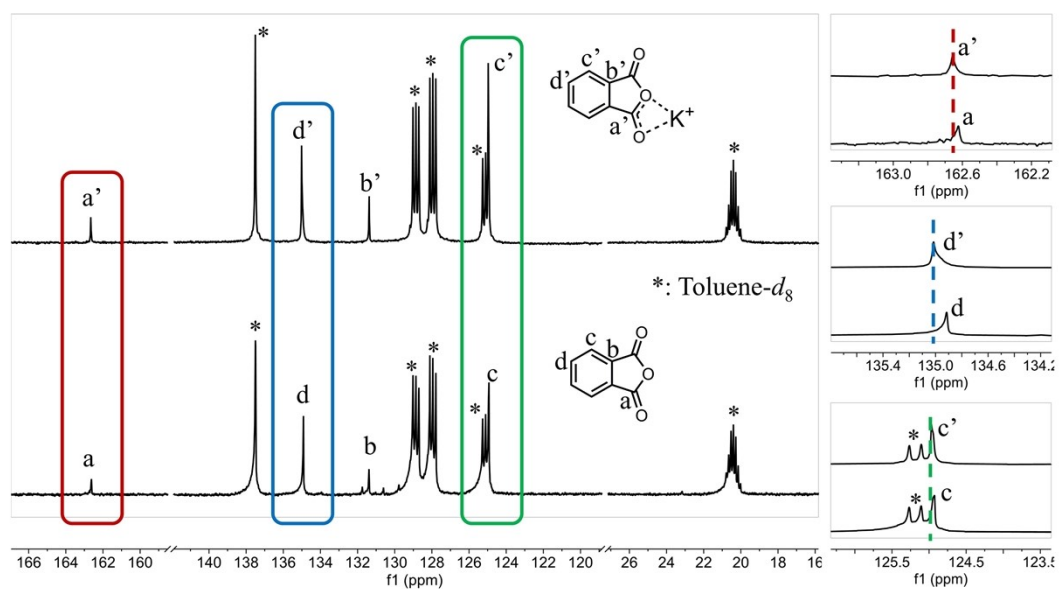

Fig. S15. The comparison of the  $^{13}\text{C}$  NMR spectra of PA (bottom) and PA/ $\text{K}_2\text{CO}_3$  (top).

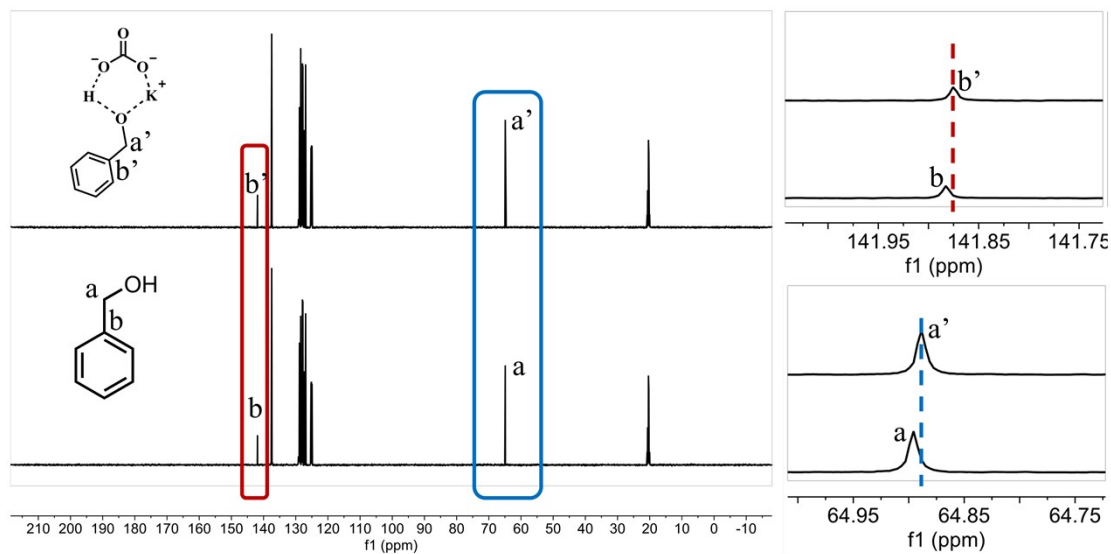

Fig. S16. The comparison of the  $^{13}\text{C}$  NMR spectra of BnOH (bottom) and BnOH/ $\text{K}_2\text{CO}_3$  (top).

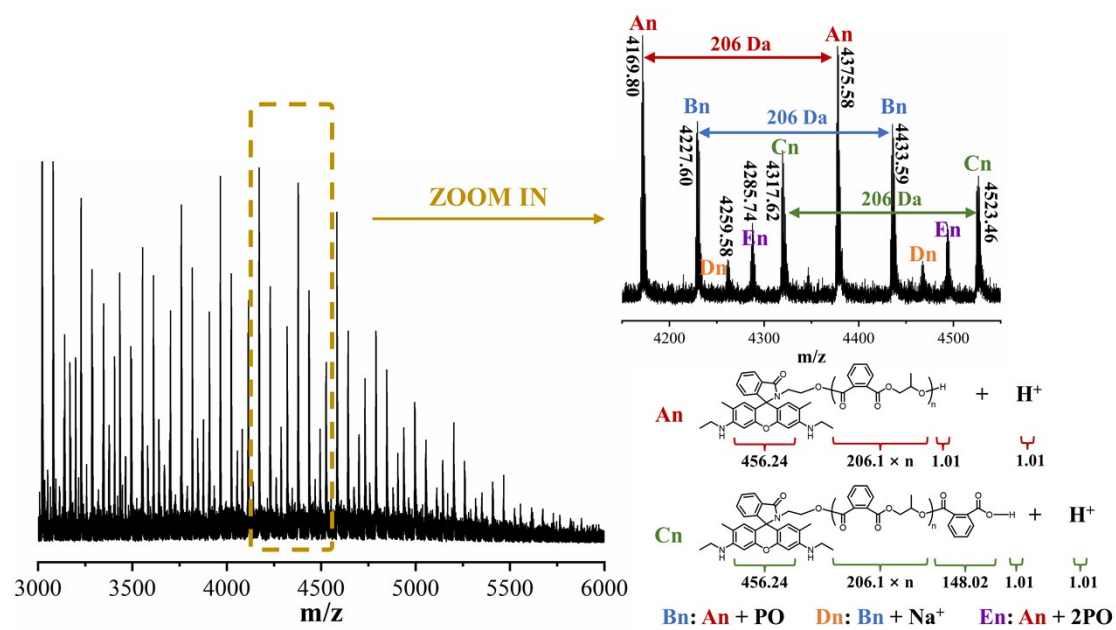

Fig. S17. The MALDI-TOF analysis of the oligomer poly(PA-*alt*-PO) initiated by dye-A ( $[\text{Cs}]:[\text{dye-A}]:[\text{PA}]:[\text{PO}] = 0.2:1:25:125$ , Conv. = 85 %,  $M_{n,\text{NMR}} = 4.9$  kg/mol,  $M_{n,\text{GPC}} = 3.1$  kg/mol,  $M_w/M_n = 1.43$ ).
